# Supplementary material for: Checklist of Fishes from Madagascar Reef, Campeche Bank, México
Source: Biodivers Data J. 2014 May 8;(2):e1100. doi: 10.3897/BDJ.2.e1100 (PMC4040402; doi:10.3897/BDJ.2.e1100)
Supplement: Supplementary material 1 — Fish species shared between Madagascar Reef and other Mexican Atlantic reefs and reef systems [file biodiversity_data_journal-2-e1100-s001.csv]

Species	Tuxpan Reef System	Veracruz Reef System	Campeche Bank	Alacranes Reef	Mexican Caribbean
Urobatis jamaicensis	•	•		•	•
Gymnothorax funebris	•	•	•	•	•
Synodus sp.	•	•	•	•	•
Sanopus reticulatus
Holocentrus adscensionis	•	•	•	•	•
Scorpaena plumieri	•	•	•	•	•
Epinephelus adscensionis	•	•	•	•	•
Epinephelus morio		•	•	•	•
Hypoplectrus ecosur					•
Mycteroperca bonaci	•	•		•	•
Mycteroperca microlepis	•	•
Mycteroperca venenosa		•	•	•	•
Serranus subligarius	•	•		•
Opistognathus aurifrons		•		•	•
Astrapogon stellatus				•	•
Echeneis sp.	•	•		•	•
Caranx ruber	•	•	•	•	•
Lutjanus apodus	•	•	•	•	•
Lutjanus griseus	•	•	•	•	•
Ocyurus chrysurus	•	•	•	•	•
Anisotremus virginicus	•	•	•	•	•
Haemulon aurolineatum	•	•	•	•	•
Haemulon plumieri	•	•	•	•	•
Calamus sp.	•	•		•	•
Equetus lanceolatus	•	•			•
Pareques umbrosus	•	•		•	•
Chaetodon ocellatus	•	•	•	•	•
Holacanthus bermudensis	•	•		•	•
Holacanthus ciliaris	•	•		•	•
Pomacanthus arcuatus		•		•	•
Abudefduf saxatilis	•	•	•	•	•
Kyphosus sectatrix	•	•	•	•	•
Stegastes variabilis	•	•	•	•	•
Halichoeres sp	•	•	•	•	•
Lachnolaimus maximus	•	•		•	•
Thalassoma bifasciatum	•	•	•	•	•
Scarus coeruleus	•	•	•	•	•
Sparisoma aurofrenatum	•	•		•	•
Sparisoma rubripinne	•	•	•	•	•
Sparisoma viride	•	•	•	•	•
Malacoctenus triangulatus	•	•		•	•
Parablennius marmoreus	•	•		•
Coryphopterus dicrus	•	•		•	•
Coryphopterus glaucofraenum	•	•		•	•
Elacatinus oceanops	•	•		•	•
Elacatinus xanthiprora				•
Tigrigobius macrodon	•			•
Ptereleotris calliura	•			•
Chaetodipterus faber	•	•			•
Acanthurus bahianus	•	•	•	•	•
Acanthurus coeruleus	•	•	•	•	•
Sphyraena barracuda	•	•		•	•
Scomberomorus maculatus		•		•
Aluterus scriptus	•	•		•	•
Non Shared Species	9	6	29	5	8
Shared Species	45	48	25	49	46
	TRS	VRS	CB	Alacranes	Mx Carib
	Tuxpan Reef System	Veracruz Reef System	Campeche Bank	Alacranes Reef	Mexican Caribbean
